# Supplementary material
Source: PubMed Central journal article supplement (PMC2631943)
Supplement: M805804200_1.pdf [file M805804200_1.pdf]

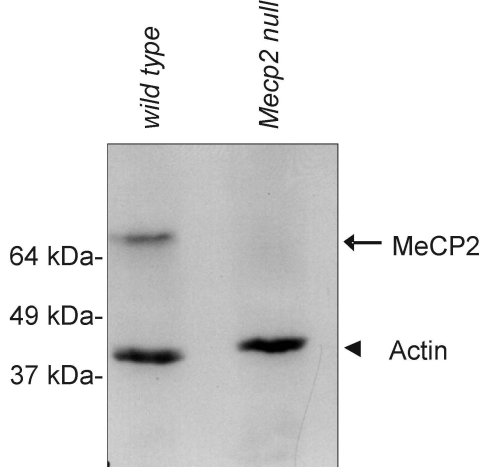

Probed with mouse monoclonal N-terminal antibody against MeCP2 (Sigma) and antibody against actin (Sigma)

Supplemental Fig 1: Specificity of N terminal Sigma antibody against MeCP2

Proteins extracted from wild type and *Mecp2* null mouse cerebellum were probed with a mouse monoclonal antibody against MeCP2, as indicated. A single band corresponding to the size of MeCP2 is seen in extract from wild type mouse tissue, not seen in extract from the null mouse.

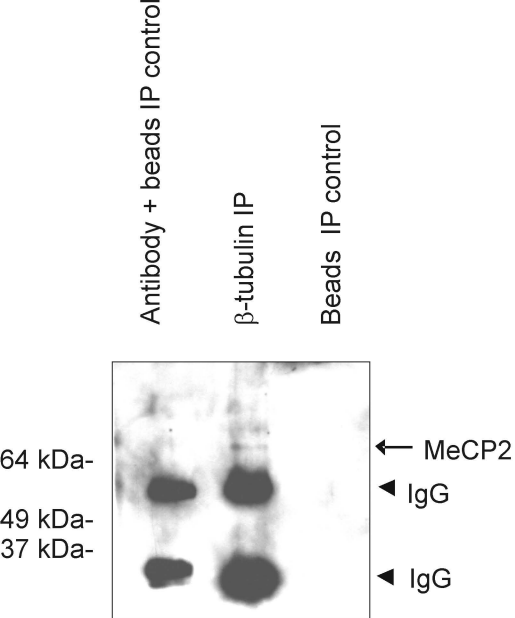

HeLa extract, IP (as indicated),  
 probed with monoclonal antibody  
 against MeCP2 (Sigma)

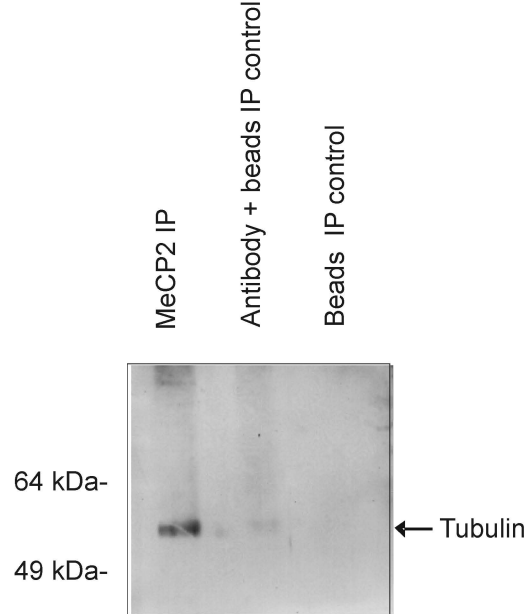

HeLa extract, IP (as indicated),  
 probed with a sheep polyclonal  
 antibody against pan tubulin (Cytoskeleton)

### Supplemental Fig 2: Controls for HeLa immunoprecipitation

Total protein extracts from HeLa cells were immunoprecipitated as indicated and probed with antibody against MeCP2 (left panel) or tubulin (right panel). MeCP2 is detected in tubulin immunoprecipitates not seen in controls. Tubulin is seen in MeCP2 immunoprecipitates, not seen in controls.

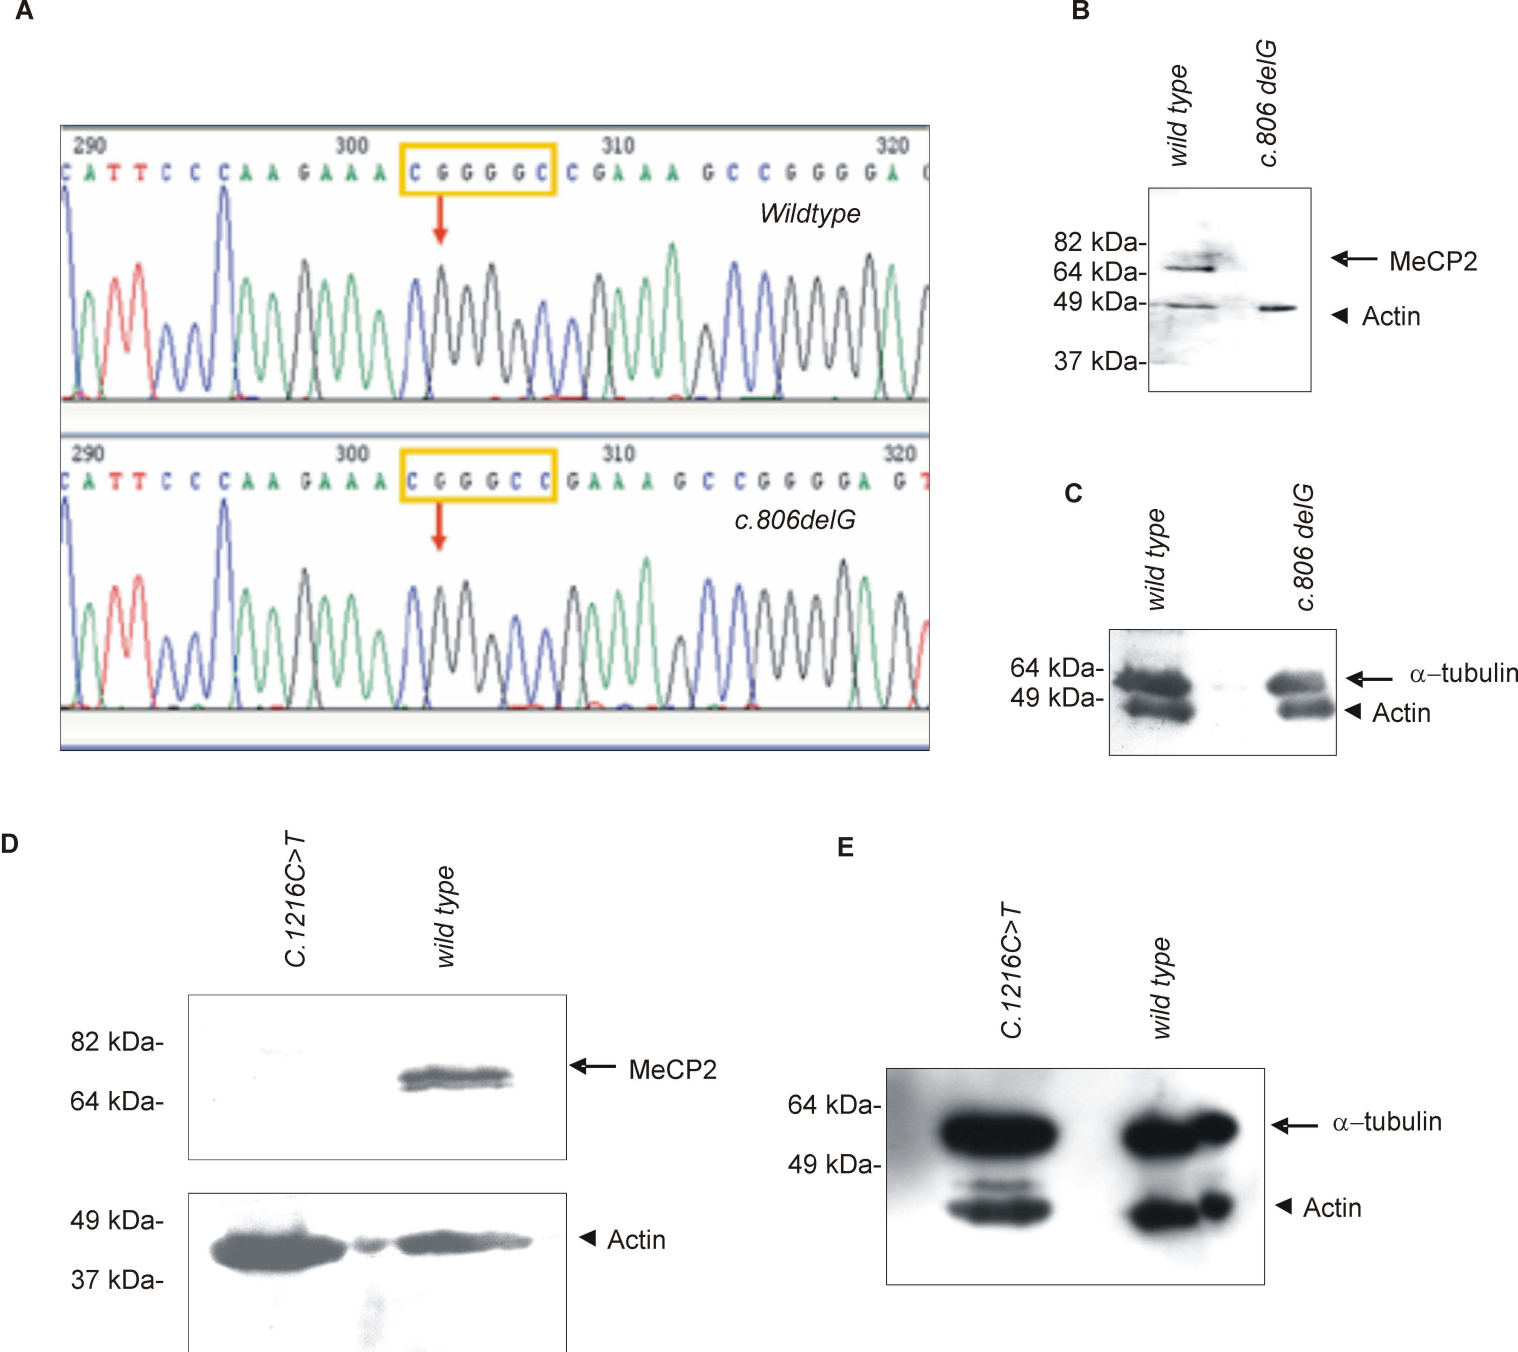

Supplemental Fig. 3: Analysis of MECP2 mutant cell lines

(A) Sequence chromatograms from DNA extracted from the cell lines generated from the male patient with neonatal encephalopathy caused by a MECP2 mutation and wild type cells. Arrow indicates the site of c.806delG deletion seen in DNA from patient derived fibroblasts, not seen in wild type fibroblasts used in the study. Nucleotides upstream and downstream of deletion are boxed. (B and D) Western blots on protein extracts from mutant and wild type cells (as labeled) using C-terminal anti-MeCP2 antibody showing absence of full length MeCP2 in patient cells. (C and E) Western blots on protein extracts from mutant and wild type cells probed with an antibody against  $\alpha$ -tubulin and actin show no changes in levels of  $\alpha$ -tubulin.

**Supplemental table 4A: Quantitative analysis of microtubule length showing percentage of pixels located within long microtubules and graphical representation of data from one experiment.**

Wild type and mutant fibroblasts were treated in parallel in each experiment. Microtubules were categorized as long if they comprised more than 50 contiguous pixels. The percentage of all pixels located within long microtubules was significantly lower in mutant compared with wild type fibroblasts at each time point, with the difference being accentuated by nocodazole and diminished by release from nocodazole. Graphical representation of data from one experiment is shown on the right.

| Experiment                                  | Percentage of all pixels located within long microtubules |                           |
|---------------------------------------------|-----------------------------------------------------------|---------------------------|
|                                             | Wild type                                                 | Mutant                    |
| <b>Untreated cells</b>                      |                                                           |                           |
| Exp1                                        | 23.05 (95% CI 22.3 - 23.8)                                | 19.8 (95% CI 18.8 - 20.9) |
| <b>5 minutes after Nocodazole treatment</b> |                                                           |                           |
| Exp1                                        | 37.2 (95% CI 35.9 - 38.4)                                 | 10.06 (95% CI 9.4 - 10.8) |
| Exp2                                        | 39.4 (95% CI 38.3 - 40.6)                                 | 6.31 (95% CI 6.0 - 6.6)   |
| <b>9 minutes after Nocodazole release</b>   |                                                           |                           |
| Exp 1                                       | 19.8 (95% CI 18.9 - 20.7)                                 | 13.5 (95% CI 12.9 - 14.2) |
| Exp2                                        | 34.7 (95% CI 33.3 - 36.2)                                 | 23.7 (95% CI 22.9 - 24.5) |

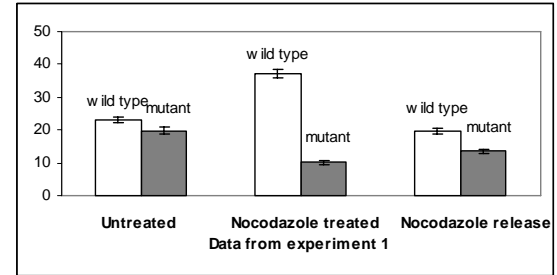

**Supplemental table 4B: Percentage of cells showing advanced depolymerisation**

Cells were visually analyzed after 5 minutes of nocodazole exposure and counted as showing advanced depolymerisation if more than 50% of the tubulin staining was composed of depolymerized tubulin. Graphical representation of the data (n=3, total 300 cells). Error bars show S.E. P value <0.0001

| Sample    | Wild type | Mutant |
|-----------|-----------|--------|
| Exp-1     | 5         | 93     |
| Exp-2     | 4         | 91     |
| Exp-3     | 5         | 93     |
| Average   | 4.67      | 92.33  |
| Std error | 0.33      | 0.67   |

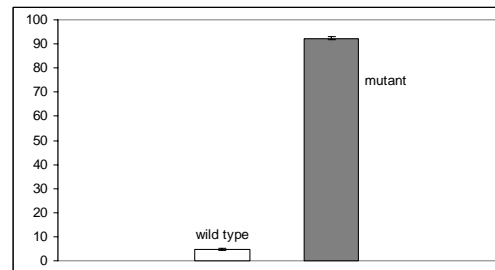

**Supplemental table 4C: Percentage of cells showing complete microtubule reassembly**

Cells were treated with nocodazole for 1 hour, stained with  $\beta$ - tubulin 9 minutes after nocodazole release and visually analyzed. Percentage of cells showing complete reassembly and graphical representation of the data (n=3, total 300 cells). Error bars show S.E. P value <0.0001

| Sample    | Wild type | Mutant |
|-----------|-----------|--------|
| Exp-1     | 99        | 10     |
| Exp-2     | 100       | 12     |
| Exp-3     | 97        | 8      |
| Average   | 98.67     | 10     |
| Std Error | 0.88      | 1.15   |

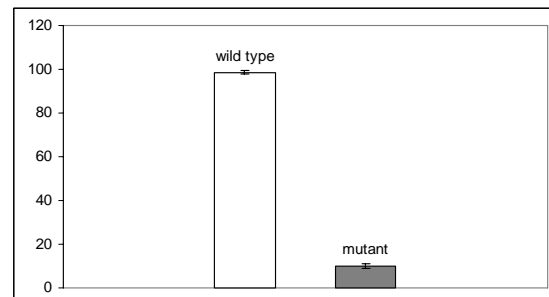

**Supplemental Table 5A: Levels of acetylated tubulin following siRNA transfection**

Cells were transfected with siRNA against MeCP2, scrambled siRNA (Neg) or siRNA against GAPDH and extracts were immunoblotted for acetylated tubulin and actin. Data was quantified using Image J software and normalised to actin (shown as raw data). Average level of acetylated tubulin in controls was calculated from datasets of cells transfected with scrambled siRNA (Neg) and siRNA against GAPDH. Decrease in acetylated tubulin levels was expressed as a percentage of the average level in controls. Data from three independent experiments is shown.

| siRNA                           | Acetylated tubulin normalized to actin |        |       | Percentage of average |        |        | Average | Std error |
|---------------------------------|----------------------------------------|--------|-------|-----------------------|--------|--------|---------|-----------|
|                                 | Exp-1                                  | Exp-2  | Exp-3 | Exp-1                 | Exp-2  | Exp-3  |         |           |
| 37                              | 12.24                                  | 49.69  | 43.78 | 40.91                 | 61.69  | 69.59  | 57.39   | 6.98      |
| 36                              | 16.78                                  | 28.2   | 30.55 | 56.09                 | 35.01  | 48.56  | 46.55   | 5.03      |
| Neg                             | 26.25                                  | 86.49  | 61.86 | 87.74                 | 107.38 | 98.33  | 97.82   | 4.63      |
| GAPDH                           | 33.58                                  | 74.6   | 63.96 | 112.25                | 92.62  | 101.67 | 102.18  | 4.63      |
| <b>Average</b><br>(Neg + GAPDH) | 29.91                                  | 80.545 | 62.91 |                       |        |        |         |           |

**Supplemental Table 5B: Levels of acetylated tubulin following MeCP2-FLAG transfection**

Cells were transfected with MeCP2-FLAG or FLAG-alone or left untreated and extracts were immunoblotted for acetylated tubulin and actin. Data was quantified using Image J software and normalised to actin (shown as raw data). Average level of acetylated tubulin in controls was calculated from datasets of untransfected cells and FLAG-alone transfected cells. Increase in acetylated tubulin levels was expressed as a percentage of the average level in controls. Data from four independent experiments is shown.

| Transfection | Acetylated tubulin normalized to actin |        |        |       | Percentage of average |        |        |        | Average | Std error |
|--------------|----------------------------------------|--------|--------|-------|-----------------------|--------|--------|--------|---------|-----------|
|              | Exp-0                                  | Exp-1  | Exp-4  | Exp-6 | Exp-0                 | Exp-1  | Exp-4  | Exp-6  |         |           |
| MeCP2- FLAG  | 170.06                                 | 573.79 | 129.34 | 74.8  | 118.81                | 157.98 | 119.43 | 189.99 | 146.55  | 17.13     |
| FLAG         | 143.14                                 | 363.2  | 108.3  | 39.37 | 100                   | 100    | 100    | 100    | 100     | 0         |

A

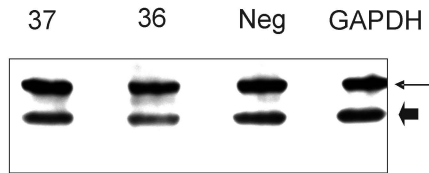

B

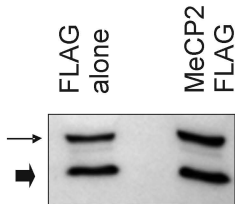

Supplemental Fig. 6: Levels of  $\alpha$ -tubulin remain unchanged after siRNA knockdown of MeCP2 and over expression of MeCP2 : Protein extracts from siRNA experiments (A) and transfection experiments (B) are shown. Blots were probed with antibodies against  $\alpha$ -tubulin and actin.

**Supplemental Table 7: Percentage of deacetylation in *in vitro* experiments**

Percentage of tubulin deacetylation was calculated from the area under the chromatograms in each experiment (n=4). Paired t test P value <0.0225.

| <b>Sample</b> | <b>Exp-1</b> | <b>Exp-2</b> | <b>Exp-3</b> | <b>Exp-4</b> | <b>Average</b> | <b>Std error</b> |
|---------------|--------------|--------------|--------------|--------------|----------------|------------------|
| HDAC6         | 12           | 28           | 14           | 12           | 16.5           | 3.86221          |
| HDAC6+MeCP2   | 6            | 7            | 1.5          | 0            | 3.625          | 1.700184         |
| HDAC6+Control | 12           | 11           | 8            | 8            | 9.75           | 1.030776         |
